# Supplementary material for: A qualitative study of the vocational and psychological perceptions and issues of transdisciplinary nurses during the COVID-19 outbreak
Source: PubMed Central journal article supplement (PMC7377893; doi:10.18632/aging.103533), 2020-07-03
Supplement: aging-12-103533-s003..pdf [file aging-12-103533-s003..pdf]

## SUPPLEMENTARY TABLE

**Supplementary Table 1. The data record table.**

| <b>Themes and Sub-themes</b>                            | <b>Results [n (%), n=25]</b> |
|---------------------------------------------------------|------------------------------|
| <b>Responsibility cognition</b>                         |                              |
| healing the wounded and rescuing the dying              | 25 (100)                     |
| the Nightingale spirit                                  | 19 (76)                      |
| win the battle against the COVID-19                     | 18 (72)                      |
| relieve mental and psychological pressure of patients   | 15 (60)                      |
| take care of the daily life of patients                 | 7 (28)                       |
| <b>Role cognition</b>                                   |                              |
| nurse                                                   | 25 (100)                     |
| friend                                                  | 22 (88)                      |
| family                                                  | 17 (68)                      |
| psychotherapist                                         | 13 (52)                      |
| patient care                                            | 5 (20)                       |
| <b>New cognition of nursing work</b>                    |                              |
| <b>With new cognition</b>                               | 25 (100)                     |
| stronger sense of responsibility and mission            | 21 (84)                      |
| more comprehensive nursing skills                       | 20 (80)                      |
| playing a variety of different roles                    | 16 (64)                      |
| full of love to patients and the job                    | 13 (52)                      |
| <b>Without new cognition</b>                            | 0 (0)                        |
| <b>Challenges of transdisciplinary nursing work</b>     |                              |
| unfamiliar working patterns                             | 25 (100)                     |
| unfamiliar working contents                             | 23 (92)                      |
| standardized professional operations                    | 20 (80)                      |
| occupational exposure and self-protection               | 20 (80)                      |
| physical and psychological quality                      | 19 (76)                      |
| <b>Psychological issues</b>                             |                              |
| grief                                                   | 22 (88)                      |
| insomnia                                                | 18 (72)                      |
| anxiety                                                 | 16 (64)                      |
| pain                                                    | 13 (52)                      |
| depressed                                               | 7 (28)                       |
| dysphoria                                               | 4 (16)                       |
| <b>Family factors of transdisciplinary nursing work</b> |                              |
| miss and worry about families                           | 25 (100)                     |
| parents don't understand                                | 12 (48)                      |
| spouse doesn't understand                               | 8 (32)                       |
| guilt towards families                                  | 5 (20)                       |
