# Supplementary material for: A qualitative study of the vocational and psychological perceptions and issues of transdisciplinary nurses during the COVID-19 outbreak
Source: PubMed Central journal article supplement (PMC7377893; doi:10.18632/aging.103533), 2020-07-03
Supplement: aging-12-103533-s004..pdf [file aging-12-103533-s004..pdf]

SUPPLEMENTARY FIGURES

### Semi-structured interview guide

#### Transdisciplinary nurses

---

**I. Basic information**

1. What's your nursing major?
2. How old are you?
3. How long have you been a nurse?
4. What's your job title?
5. Have you been a nurse in respiratory medicine, infection department, emergency department or intensive care unit for a long time?
6. What is your current marital status?
7. Do you have children? Are you pregnant?

**II. The cognition of nursing work**

1. What are the responsibilities and obligations of a nurse in the face of sudden acute infectious outbreak threatening public health like the COVID-19?
2. What responsibilities and obligations do you think you have fulfilled as a nurse in the COVID-19 outbreak?
3. What roles should nurses play in the face of sudden acute infectious outbreak threatening public health like the COVID-19?
4. What roles do you think you played in the COVID-19 outbreak?
5. What are the changes in your cognition about the nurses' responsibilities and obligations in the COVID-19 outbreak?

**III. Responsibility cognition of transdisciplinary nursing work**

1. As a transdisciplinary nurse, what do you think the differences of responsibilities from your previous daily nursing work?
2. What challenges and risks have you faced in the COVID-19 outbreak?
3. Which challenges or risks are resulted from the transdisciplinary work?
4. How do you overcome challenges and mitigate risks led by the transdisciplinary work?
5. As a transdisciplinary nurse, what are your attitudes of risk and protection awareness against infectious diseases?
6. What is your new understanding of nursing risks and risk prevention of acute infectious diseases through the COVID-19 outbreak?

---

**IV. Psychological issues caused by transdisciplinary nursing work**

1. Is there any professional psychological training for transdisciplinary nurses before joining the frontline work?
2. What are the main psychological problems you haven't encountered in your previous daily nursing work?
3. What are the psychological activities or fluctuations when confronted with tough problems during the transdisciplinary nursing work?
4. Did you ever feel sorrowful in the period of fighting against the COVID-19 outbreak?
5. Is there any special psychological counseling platform for medical workers?

**V. Family factors of transdisciplinary nursing work**

1. Is it the voluntary registration or hospital arrangement for going to the front against the COVID-19 outbreak?
2. As a transdisciplinary nurse going to the frontline, what problems of family aspect did you encounter?
3. What kind of support and encouragement did you get from your family?
4. During the transdisciplinary nursing work in the COVID-19 outbreak, what are your main concerns about family?

Supplementary Figure 1. The semi-structural interview guide including five parts.

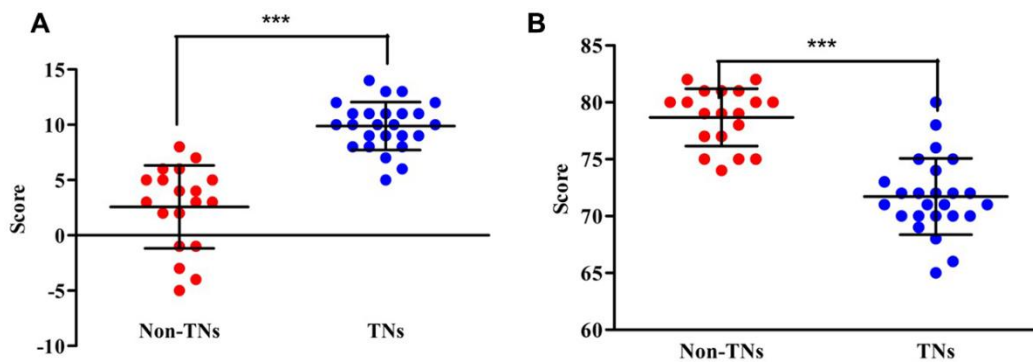

Supplementary Figure 2. The perceived stress levels and the amount of perceived social supports of TNs and Non-TNs. (A) the perceived stress scores, the higher score represents the higher level of perceived stress. (B) the perceived social support scores, the higher score represents the higher perceived social support level. The data are normally distributed, and are expressed as the means  $\pm$  SD. \*\*\* $p < 0.001$  TNs vs. Non-TNs.
